# Supplementary material for: Genome-scale model development and genomic sequencing of the oleaginous clade Lipomyces
Source: Front Bioeng Biotechnol. 2024 Apr 4;12:1356551. doi: 10.3389/fbioe.2024.1356551 (PMC11024372; doi:10.3389/fbioe.2024.1356551)
Supplement: Supplementary file 1 [file Table2.XLSX]

## Sheet: info
This file contains the sizes of organisms genomes and their corresponding proteins, as well as predictions of the number and types of CAZy in the species.
Additionally, the file contains the number of proteins for each organism that did not have orthologs in Lipomyces starkeyi NRRL 11557 and their KEGG definitions and associated KEGG pathways (in the KEGGdef and keggpathway sheets, respectively).

## Sheet: Genome Stats
JGI_ID	Genome Size (MbP)	gene avg	transcript avg	exon	intron	protein length	exons per gene	Genes	Name
Lipst1_1	21.27	1547	1419	498	71	407	2.85	8192	Lipomyces starkeyi NRRL Y-11557
Liptetr1	20.46	1752	1616	530	68	437	3.05	8129	Lipomyces tetrasporus NRRL Y-11562
Liptet1	20.78	1730	1592	518	69	441	3.07	8004	Lipomyces tetrasporus NRRL Y-64009
Liptetra1	20.09	1772	1634	532	68	442	3.07	7903	Lipomyces tetrasporus NRRL Y-8875
Lst7536_1	20.36	1743	1607	524	68	439	3.07	7864	Lipomyces starkeyi CBS 7536
Lipotetr1	19.92	1761	1624	527	68	442	3.08	7831	Lipomyces tetrasporus Phaff 51-55
Lipokono1	19.38	1763	1627	528	68	443	3.08	7799	Lipomyces kononenkoae CBS 7786
Ldo8726_1	20.12	1771	1635	529	67	445	3.09	7790	Lipomyces doorenjongii CBS 8726
Lipori1_1	19.86	1795	1659	537	67	449	3.09	7764	Lipomyces orientalis CBS 10300
Lipstark1_1	20.06	1767	1632	537	68	442	3.04	7747	Lipomyces starkeyi Phaff 55-103
Lipsta1_1	19.97	1762	1627	531	67	440	3.07	7746	Lipomyces starkeyi Phaff 78-25
Lipstar1_1	19.59	1771	1635	537	69	443	3.04	7603	Lipomyces starkeyi Phaff 78-24
Lst7851_1	19.72	1758	1621	526	67	443	3.08	7581	Lipomyces starkeyi CBS 7851
Lipdoo1	19.4	1791	1652	535	68	448	3.09	7558	Lipomyces doorenjongii Phaff 78-26
Lipodoor1	18.88	1794	1654	527	67	451	3.14	7320	Lipomyces doorenjongii NRRL Y-27504
Lst8064_1	18.44	1780	1641	528	68	449	3.11	7211	Lipomyces starkeyi CBS 8064
Lipkon1	16.95	1825	1686	540	68	457	3.12	7139	Lipomyces kononenkoae NRRL Y-11553
Yarlip1	20.08	1609	1527	1173	272	445	1.3	6858	Yarrowia lipolytica FKP355
Lipmes1	16.87	1781	1638	517	68	448	3.17	6759	Lipomyces mesembrius CBS 7600
Lipchi1	16.37	1839	1698	534	67	463	3.18	6545	Lipomyces chichibuensis CBS 12929
Babin1	15.22	1565	1497	1184	256	434	1.27	6403	Babjeviella inositovora NRRL Y-12698
Myxme1	15.33	1849	1710	607	79	481	2.82	6299	Myxozyma melibiosi Phaff 52-87
Lipsuo1	14	1892	1755	598	73	485	2.93	6130	Lipomyces suomiensis NRRL Y-17356
Lipsmi1	14.15	1865	1755	652	67	494	2.69	6067	Lipomyces smithiae NRRL Y-17922
Dipuni1	16.24	1872	1711	646	100	475	2.65	6018	Dipodascopsis uninucleata Phaff 50-6
Lipjap1	13.37	1798	1663	592	76	468	2.81	5843	Lipomyces japonicus CBS 7319
Lipoli1	13.58	1830	1717	655	72	488	2.62	5781	Lipomyces oligophaga CBS 7107
Liparx1	11.92	1753	1638	531	57	468	3.09	5729	Lipomyces arxii Phaff 12-163
Diptot1	13.13	1703	1595	652	76	459	2.45	5632	Dipodascopsis tothii CBS 759.85

## Sheet: CAZy
Annotation Description		CAZy	Auxiliary Activities family	Auxiliary Activity Family 1	Auxiliary Activity Family 2	Auxiliary Activity Family 3	Auxiliary Activity Family 4	Auxiliary Activity Family 5	Auxiliary Activity Family 6	Auxiliary Activity Family 7	Auxiliary Activity Family 9	Carbohydrate-Binding Module Family 91	Carbohydrate-Binding Module family	Carbohydrate-Binding Module Family 1	Carbohydrate-Binding Module Family 18	Carbohydrate-Binding Module Family 19	Carbohydrate-Binding Module Family 20	Carbohydrate-Binding Module Family 21	Carbohydrate-Binding Module Family 24	Carbohydrate-Binding Module Family 32	Carbohydrate-Binding Module Family 38	Carbohydrate-Binding Module Family 48	Carbohydrate-Binding Module Family 50	Carbohydrate-Binding Module Family 66	Carbohydrate-Binding Module Family 67	Carbohydrate Esterase family	Carbohydrate Esterase Family 3	Carbohydrate Esterase Family 4	Carbohydrate Esterase Family 16	Distantly related to plant expansins	Glycoside Hydrolase Family 172	Glycoside Hydrolase Family 183	Glycoside Hydrolase Family 184	Glycoside Hydrolase family	Glycoside Hydrolase Family 1	Glycoside Hydrolase Family 2	Glycoside Hydrolase Family 3	Glycoside Hydrolase Family 5	Glycoside Hydrolase Family 12	Glycoside Hydrolase Family 13	Glycoside Hydrolase Family 15	Glycoside Hydrolase Family 16	Glycoside Hydrolase Family 17	Glycoside Hydrolase Family 18	Glycoside Hydrolase Family 27	Glycoside Hydrolase Family 28	Glycoside Hydrolase Family 30	Glycoside Hydrolase Family 31	Glycoside Hydrolase Family 32
		CAZy	AA	AA1	AA2	AA3	AA4	AA5	AA6	AA7	AA9	CBM91	CBM	CBM1	CBM18	CBM19	CBM20	CBM21	CBM24	CBM32	CBM38	CBM48	CBM50	CBM66	CBM67	CE	CE3	CE4	CE16	EXPN	GH172	GH183	GH184	GH	GH1	GH2	GH3	GH5	GH12	GH13	GH15	GH16	GH17	GH18	GH27	GH28	GH30	GH31	GH32
Diptot1	13.13	145	8	3	2			1	1		1		10	2	2			1			1	3	1			3		2	1	1				54	1	1	2	7		3	1	3	4	2				2	1
Dipuni1	16.24	180	11	7	2			1	1				9		3			1				3	1		1	5		3	2	1				82	1	2	5	8		7	1	3	2	3		2	1	4	3
Ldo8726_1	20.12	241	21	7	2	3		1	7		1		17		6	1		1		1	2	4	1	1		4	2	2		1			1	98		5	9	8		13	1	4	4	5	2			5	7
Liparx1	11.92	165	9	3	2			1	2		1	1	14		8	1		1				4				5		4	1	1				60		1	3	7		3	1	5	4	4				2
Lipchi1	16.37	179	14	6	2	1		1	3		1		14		6	1		1			1	4	1			3	1	2		1				60		1	1	6		6	1	4	4	5	1			2	2
Lipdoo1	19.4	237	19	6	2	3		1	6		1		18		6	1		1		1	4	3	1	1		3	1	2		1				102		5	10	8		11	1	4	4	5	2			5	12
Lipjap1	13.37	146	7	2	2				2		1		6		1			1		1		3				3		2	1	1				59	2	2	2	6		2	1	4	3	3		2		2	1
Lipkon1	16.95	217	17	5	2	6		1	3				16		7	1		1			1	3	2	1		2		2		1				87		1	3	5		11	1	6	4	7	2			7	4
Lipmes1	16.87	192	13	6	2			3	2				16		6	1		1		4		3	1			3	1	2		1				63			1	6		8	1	4	4	6	1			1	3
Lipodoor1	18.88	254	20	6	2	3		1	7		1	1	25		10	1		1		1	7	3	1	1		4	2	2		1	1		1	113		4	6	7		18	1	4	4	7	3	1		5	17
Lipokono1	19.38	246	15	5	2	3		1	4				22		7	1	1	4			2	3	3	1		2		2		1	1	1	1	106		3	5	8		20	2	4	4	7	2			6	8
Lipoli1	13.58	156	12	6	2		1	1	2				14		9			1				3	1			3		3		1				54		1	1	5		3	1	6	4	4				2
Lipori1_1	19.86	237	20	7	2	4		2	3		2		22	1	6	1		1	4	2	3	3	1			4		4		1	1			100	1	5	5	7		11	1	4	3	5	1			8	8
Lipotetr1	19.92	237	23	9	2	5		2	3		2		23	1	6	1		1		2	7	4	1			4		4		1	3			98	1	3	4	7	1	15	1	4	3	5	2			6	11
Lipsmi1	14.15	140	11	4	2	1	2		2				5		1			1				3				3		3		1				52			2	5		4	1	6	4	3				1
Lipst1_1	21.27	265	21	9	2	3		1	5		1		25		6	1		3	4	1	6	3	1			4	2	2		1	4			114		3	6	7		24	1	5	7	5	3			6	9
Lipsta1_1	19.97	255	28	11	2	7		1	6		1		16		6	1		1			3	3	1	1		3	1	2		1	1			108	1	5	6	7		17	1	5	4	6	5			8	11
Lipstar1_1	19.59	259	21	8	2	3		1	5	1	1		25		6	1		3	4		6	4	1			2		2		1	3			111		3	6	7		21	1	5	6	5	3			5	12
Lipstark1_1	20.06	264	22	9	2	3		1	5	1	1		23		6	1		3	3		6	3	1			4	2	2		1	5			112		3	6	7		22	1	5	6	5	3			6	11
Lipsuo1	14	178	17	7	2		2	1	3		2	1	12		8			1				3				5		4	1	1				65	1	1	4	8		3	1	5	4	4		1		2
Liptet1	20.78	241	26	9	2	7		2	4		2		21	1	6	1		1		1	7	3	1			4		4		1	4			101	1	3	4	7	1	17	1	4	3	5	2			6	10
Liptetr1	20.46	256	24	10	2	4		3	3		2		28	1	6	1		1	4	4	5	4	1	1		4		4		1	3			109	1	3	5	8	1	19	2	4	3	5	2			6	8
Liptetra1	20.09	243	25	10	2	6		2	3		2		24	1	6	1		1		3	7	4	1			4		4		1	4			100	1	3	4	7	1	15	1	4	3	5	2			7	10
Lst7536_1	20.36	267	27	11	2	6		1	6		1		17		6	1		1			4	4	1			3	1	2		1	2		1	118	2	5	9	7		22	1	5	4	7	5			7	12
Lst7851_1	19.72	241	23	11	2	5		1	3		1		15		6	1		1			2	4	1			4	2	2		1	2		2	104		3	7	8		17	1	5	4	6	4			6	7
Lst8064_1	18.44	204	18	8	2	1		1	5		1		15		6	1		1			1	4	1	1		2		2		1			1	78		1	1	6		12	1	5	4	5	2		1	5	3
Myxme1	15.33	184	14	7			2	1	3		1		14		7			1		2		3			1	5		4	1					74	1	1	5	7		3	1	5	4	4		2		4
Total		5829	486	192	52	74	7	33	99	2	27	3	466	7	159	20	1	36	19	23	75	91	25	8	2	95	15	73	7	26	34	1	7	2382	14	68	122	186	4	327	29	122	107	133	47	8	2	126	170
[truncated: 69 more columns]

## Sheet: KEGGdef
Species	12-oxophytodienoate reductase.	15-hydroxyprostaglandin dehydrogenase (NAD+).	3-beta-hydroxy-4-alpha-methylcholestenecarboxylate 3-dehydrogenase (decarboxylating).	3-oxoacyl-[acyl-carrier protein] reductase.	Acid phosphatase.	Acting on the CH-OH group of donors.	Acylglycerol lipase.	Acylglycerone-phosphate reductase.	Acylpyruvate hydrolase.	Alcohol dehydrogenase (NADP+).	Alcohol dehydrogenase.	Aldehyde dehydrogenase (NAD(P)+).	Aldehyde reductase.	Alpha-glucosidase.	Benzoate 4-monooxygenase.	Beta-glucosidase.	Candidapepsin.	Catalase.	Cellulase.	Chitinase.	Cyclohexanone monooxygenase.	Exo-alpha-sialidase.	Fructan beta-fructosidase.	Glucan 1,4-alpha-glucosidase.	Glutamate synthase (NADH).	Glutamate synthase (NADPH).	Glutathione transferase.	Glycerol 2-dehydrogenase (NADP+).	Inulinase.	L-iditol 2-dehydrogenase.	L-xylulose reductase.	Lactoylglutathione lyase.	Myo-inositol 2-dehydrogenase.	NADPH:quinone reductase.	Protein-L-isoaspartate(D-aspartate) O-methyltransferase.	Protochlorophyllide reductase.	Pyridoxine 4-dehydrogenase.	Salicylate 1-monooxygenase.	Serine/threonine specific protein phosphatase.	Superoxide dismutase.	Tetrahydroxynaphthalene reductase.	Threonine--tRNA ligase.	Transferred entry: 1.6.99.2.	Triacylglycerol lipase.	Ubiquitin--protein ligase.	Unspecific monooxygenase.	With 2-oxoglutarate as one donor, and incorporation of one	With NAD(+) or NADP(+) as acceptor.	Xenobiotic-transporting ATPase.
Ldo8726_1			3	4	5	3				5		3	3			4							5				8	5	3				3	5	4	6						4	4					4
Babin1																				4		6		3										3											6
Diptot1																												3																	3
Dipuni1				3																																									3
Liparx1																																													3			3
Lipdoo1				4	4	3				5						3											5							6	4	4							3		3
Lipjap1																																													4
Lipkon1				4	3	3																					3							5	3	3									3			4
Lipmes1					3																																								4
Lipodoor1				4				3																										5		3									3
Lipokono1				7	4	5		3																			4							4	4	4									3			6
Lipoli1																																																4
Lipori1_1				8	3	3																									3			4		6									3			6
Lipotetr1	4			1	3	6		3		4								3	3								3			3	3			7		8			3		3			3	3			8	3
Lipsmi1									3		3				3													4						3				4							3			3
Lipsta1_1				4						3				3											3	3	4							4			4								4
Lipstark1_1																																													3
Lipsuo1		4		4					4												3							3										6							3	3		5
Liptet1	4			1	3	6	3	3		3								3	3								5			3	3			7		8					3			3	4			8
Liptetr1	3			9		4	4			3								3							4	4	4				3			7		5								3	4			7
Liptetra1	4			9	3	6		3		3								3	3								4			3	3			7		8			3		3			3	4			8	3
Lst7536_1				4						3				3		3																3		5			4								4
Lst7851_1																																		3		5
Lst864_1																									4	4	3																		3
Myxme1		4		3					3								3				3							4										4							4	4		4
Yarlip1																	5																							3					6		3
[truncated: 1 more columns]

## Sheet: KEGGPathways
Species	Aminoacyl-tRNA biosynthesis	1,4-Dichlorobenzene degradation	Alanine and aspartate metabolism	Aminosugars metabolism	Androgen and estrogen metabolism	Arginine and proline metabolism	Ascorbate and aldarate metabolism	Benzoate degradation via CoA ligation	Benzoate degradation via hydroxylation	Bile acid biosynthesis	Butanoate metabolism	Caprolactam degradation	Carbon fixation	Cyanoamino acid metabolism	Cysteine metabolism	D-Arginine and D-ornithine metabolism	Ethylbenzene degradation	Fatty acid biosynthesis (path 1)	Fatty acid metabolism	Flavonoids, stilbene and lignin biosynthesis	Fluorene degradation	Fructose and mannose metabolism	Galactose metabolism	Globoside metabolism	Glutamate metabolism	Glutathione metabolism	Glycerolipid metabolism	Glycine, serine and threonine metabolism	Glycolysis / Gluconeogenesis	Glyoxylate and dicarboxylate metabolism	Histidine metabolism	Inositol metabolism	Inositol phosphate metabolism	Lysine degradation	Methane metabolism	N-Glycan degradation	Nicotinate and nicotinamide metabolism	Nitorobenzene degradation	Nitrogen metabolism	Nucleotide sugars metabolism	Oxidative phosphorylation	Pantothenate and CoA biosynthesis	Pentose and glucuronate interconversions	Pentose phosphate pathway	Phenylalanine metabolism	Phenylalanine, tyrosine and tryptophan biosynthesis	Phospholipid degradation	Porphyrin and chlorophyll metabolism	Propanoate metabolism
Ldo8726_1	4		3			5	8	12	3	6	9	7	3	5			4	5	4	7	3	2	13		3	8	25	13	11	4	3	4	4	8	3	3		3		5	3		12	5	4			6	5
Babin1			4	1		9			5	3	6	3			3	3			3			6	3	3	3		12	5	4		3					7	4				4		7		4	4		3
Diptot1									4		3									3		3					5														3		3
Dipuni1							3	4	5	5	6	3					3	3	3	3		3	7				8	4	7											3	3		5		3
Liparx1							3	4	4	5	5										3	5	5				7	5	3					4						5	3		5
Lipchi1																																									3
Lipdoo1						4	5	9	3	3	6	7	3	4			4	4	3	6	3	1	7			5	17	7	11	3		3	3	5						3	3		1	5	3			4	4
Lipjap1														3						3							3														3
Lipkon1							4	1		6	5						4	5	3	5		8	9			3	12	7	4					4						4	3		6				3	3
Lipmes1							3	5				3					3					5	5				6	3													3		5
Lipodoor1							4	5		3	3						3	4		3		5	4				8	5	3					3	3					4	3		5					3	3
Lipokono1						3	6	14		8	8	3					6	7	4	3		1	1		4	4	16	8	4			3	3	7						6	3		9				3	4
Lipoli1							4	6	4	6	7	4							4			4	5				1	7	4					6						4	3		6
Lipori1_1						4	8	13		7	12	3					5	8	3	4		8	1		3		15	11	4	3				1						6	3	3	13					6	4
Lipotetr1					3	4	11	17		11	13	5		3			8	1		5		13	13		4	3	22	13	7		3			1	5				3	8	5		12		4			8	4
Lipsmi1							4	7	5	7	6								5		5	6	7				12	6	7				3	4				5		3	3		4		3
Lipsta1_1						4	5	5	3	5	7	3		3				4	4	4		8	1	3	3	4	16	5	6					5	4				4		4		5	3					3
Lipstar1_1																							3																		3
Lipstark1_1																						3	4				4														3		5
Lipsuo1		3					8	11	5	1	1	4		3			3	4	8	4	8	7	8				14	8	6		3			8				7		7	4		4		3
Liptet1				3	3	4	11	17		11	14	4		3			8	1	3	5		13	13		4	5	23	13	6		3			11	6				3	8	5		11		4			8	4
Liptetr1				3		3	1	13	4	9	14	4					6	9	3	3		1	12		5	4	21	11	5					1	4				6	7	3		11					5	5
Liptetra1					3	4	11	17		11	13	4		3			8	9		5		13	13		4	4	22	13	6		3			1	5				3	8	5		11		4			8	4
Lst7536_1						3	5	5	4	5	8	3		4				5	4	4		8	11	3	3		17	7	7		3			5	3				3		4		5	3	3				3
Lst7851_1								3	3		6												5		4		6	5			3			3	3						3		5		3			5
Lst864_1							3	3			3														5	3	3							3					4		3
Myxme1		3					6	8	5	9	8	4		3				3	9	4	6	7	8				16	7	6		3			7				5		6	3		6		3
Yarlip1			3	7		8					4					3	3									3	3	3								3	4				4							3
[truncated: 17 more columns]
