# Supplementary material for: Genome-scale model development and genomic sequencing of the oleaginous clade Lipomyces
Source: Front Bioeng Biotechnol. 2024 Apr 4;12:1356551. doi: 10.3389/fbioe.2024.1356551 (PMC11024372; doi:10.3389/fbioe.2024.1356551)
Supplement: Supplementary file 3 [file Table4.XLSX]

## Sheet: pathwayPercentsinNRRL11557
	Pentose and glucuronate interconversions	Galactose metabolism	Starch and sucrose metabolism	Purine metabolism	gamma-Hexachlorocyclohexane degradation	Riboflavin metabolism	Aminosugars metabolism	Glyoxylate and dicarboxylate metabolism	Nitrogen metabolism	Tryptophan metabolism	Cyanoamino acid metabolism	Flavonoids, stilbene and lignin biosynthesis	Fatty acid metabolism	Oxidative phosphorylation	\N	RNA polymerase	Pyrimidine metabolism	Folate biosynthesis	Glutamate metabolism	Reductive carboxylate cycle (CO2 fixation)	Citrate cycle (TCA cycle)	Phospholipid degradation	Ascorbate and aldarate metabolism	Fluorene degradation	Glycerolipid metabolism	Pentose phosphate pathway	Carbon fixation	Benzoate degradation via CoA ligation	Phenylalanine metabolism	Arginine and proline metabolism	Styrene degradation	Lysine biosynthesis	Vitamin B6 metabolism	1,2-Dichloroethane degradation	Valine, leucine and isoleucine degradation	Glycolysis / Gluconeogenesis	Propanoate metabolism	Bile acid biosynthesis	Butanoate metabolism	beta-Alanine metabolism	Pyruvate metabolism	Histidine metabolism	Lysine degradation	Fatty acid biosynthesis (path 2)	Synthesis and degradation of ketone bodies	N-Glycan degradation	Sphingoglycolipid metabolism	Tyrosine metabolism	1,4-Dichlorobenzene degradation
Ldo8726_1	84.8485	94.1176	96.8254	100	88.8889	94.4444	100	100	100	100	100	82.3529	100	95.6522	96.1014	100	100	97.9167	96.4286	100	100	92.3077	88.8889	91.6667	96.0938	100	100	93.1507	100	100	100	96.5517	90.9091	100	100	97.2222	100	95.122	91.2281	92.8571	100	100	96.9231	100	66.6667	100	97.8022	97.7778	100
Babin1	36.3636	33.3333	67.4603	86.9822	29.6296	50	76.6667	58.3333	81.25	61.194	70	41.1765	54.1667	95.6522	72.7096	92.3077	86.3636	83.3333	89.2857	87.5	95	38.4615	27.7778	25	58.5938	95	82.3529	50.6849	72	80.6452	33.3333	75.8621	27.2727	100	73.913	75	84.6154	36.5854	47.3684	85.7143	75.8621	81.0811	50.7692	66.6667	33.3333	56.4103	64.8352	62.2222	42.8571
Diptot1	50	45.098	85.7143	94.6746	55.5556	77.7778	83.3333	83.3333	87.5	82.0896	90	52.9412	79.1667	95.6522	82.2612	92.3077	94.3182	95.8333	96.4286	87.5	90	69.2308	38.8889	50	71.875	90	82.3529	67.1233	84	96.7742	75	82.7586	39.3939	100	73.913	86.1111	100	51.2195	59.6491	92.8571	93.1034	94.5946	67.6923	83.3333	66.6667	61.5385	74.7253	80	85.7143
Dipuni1	60.6061	60.7843	86.5079	97.6331	55.5556	88.8889	86.6667	100	93.75	83.5821	90	52.9412	66.6667	100	86.5497	100	97.7273	95.8333	96.4286	100	100	84.6154	50	41.6667	78.9062	100	100	72.6027	88	96.7742	75	89.6552	54.5455	100	78.2609	88.8889	100	58.5366	66.6667	92.8571	89.6552	94.5946	75.3846	83.3333	66.6667	89.7436	86.8132	82.2222	85.7143
Liparx1	50	50.9804	87.3016	98.8166	74.0741	83.3333	90	83.3333	93.75	89.5522	90	64.7059	83.3333	95.6522	85.575	96.1538	97.7273	95.8333	96.4286	87.5	95	84.6154	50	66.6667	78.125	95	94.1176	69.863	88	96.7742	83.3333	86.2069	48.4848	100	82.6087	91.6667	100	60.9756	63.1579	92.8571	93.1034	94.5946	70.7692	83.3333	66.6667	92.3077	90.1099	84.4444	85.7143
Lipchi1	56.0606	54.902	88.8889	99.4083	85.1852	88.8889	100	91.6667	93.75	94.0299	80	64.7059	100	95.6522	93.1774	100	100	97.9167	96.4286	100	100	92.3077	58.3333	66.6667	87.5	95	100	76.7123	100	96.7742	100	93.1034	57.5758	100	100	91.6667	100	68.2927	70.1754	92.8571	96.5517	100	80	100	66.6667	97.4359	96.7033	95.5556	100
Lipdoo1	80.303	90.1961	96.8254	100	88.8889	94.4444	100	100	100	100	100	82.3529	100	95.6522	96.2963	100	100	97.9167	96.4286	100	100	92.3077	83.3333	91.6667	94.5312	100	100	90.411	100	100	100	96.5517	84.8485	100	100	97.2222	100	90.2439	85.9649	92.8571	100	100	93.8462	100	66.6667	100	97.8022	97.7778	100
Lipjap1	48.4848	45.098	83.3333	97.6331	59.2593	77.7778	90	83.3333	100	83.5821	80	52.9412	83.3333	95.6522	86.1598	92.3077	96.5909	91.6667	92.8571	87.5	95	76.9231	44.4444	58.3333	77.3438	95	94.1176	71.2329	88	93.5484	58.3333	96.5517	42.4242	100	82.6087	91.6667	92.3077	53.6585	63.1579	92.8571	93.1034	97.2973	72.3077	83.3333	66.6667	84.6154	86.8132	84.4444	71.4286
Lipkon1	69.697	80.3922	93.6508	100	96.2963	100	100	91.6667	100	97.0149	100	88.2353	100	100	93.7622	100	100	97.9167	100	87.5	95	92.3077	77.7778	91.6667	89.8438	90	82.3529	86.3014	96	100	91.6667	96.5517	75.7576	100	95.6522	94.4444	100	78.0488	82.4561	100	96.5517	97.2973	89.2308	100	66.6667	94.8718	95.6044	95.5556	85.7143
Lipmes1	56.0606	72.549	92.0635	99.4083	77.7778	88.8889	100	91.6667	100	95.5224	100	70.5882	95.8333	100	93.3723	100	100	97.9167	96.4286	100	100	92.3077	61.1111	66.6667	86.7188	95	94.1176	79.4521	96	96.7742	83.3333	93.1034	60.6061	100	100	88.8889	100	70.7317	73.6842	92.8571	96.5517	97.2973	80	100	66.6667	97.4359	95.6044	91.1111	71.4286
Lipodoor1	78.7879	92.1569	96.8254	100	88.8889	94.4444	100	91.6667	100	100	100	82.3529	100	100	95.1267	100	100	97.9167	96.4286	100	100	92.3077	86.1111	83.3333	95.3125	100	100	90.411	100	100	100	96.5517	87.8788	100	100	97.2222	100	92.6829	89.4737	92.8571	100	100	95.3846	100	66.6667	100	97.8022	97.7778	100
Lipokono1	81.8182	86.2745	96.0317	100	96.2963	100	100	83.3333	100	98.5075	100	88.2353	100	95.6522	95.9064	100	100	97.9167	100	87.5	95	92.3077	80.5556	91.6667	92.9688	100	94.1176	86.3014	96	100	83.3333	96.5517	78.7879	100	95.6522	97.2222	100	80.4878	82.4561	100	96.5517	97.2973	89.2308	100	66.6667	94.8718	94.5055	93.3333	71.4286
Lipoli1	45.4545	43.1373	84.127	97.0414	81.4815	88.8889	90	83.3333	87.5	86.5672	80	70.5882	87.5	95.6522	86.3548	100	95.4545	93.75	96.4286	87.5	95	84.6154	44.4444	66.6667	75.7812	90	88.2353	67.1233	88	96.7742	91.6667	86.2069	39.3939	100	78.2609	91.6667	100	53.6585	57.8947	92.8571	93.1034	94.5946	70.7692	83.3333	66.6667	87.1795	87.9121	86.6667	100
Lipori1_1	84.8485	84.3137	96.0317	100	85.1852	88.8889	100	91.6667	100	98.5075	100	88.2353	95.8333	95.6522	95.3216	100	100	100	96.4286	100	100	92.3077	77.7778	83.3333	91.4062	95	100	83.5616	100	100	100	96.5517	75.7576	100	100	97.2222	100	82.9268	82.4561	92.8571	100	100	86.1538	100	66.6667	97.4359	95.6044	97.7778	100
Lipotetr1	75.7576	78.4314	94.4444	100	77.7778	83.3333	100	83.3333	100	98.5075	100	88.2353	95.8333	100	94.7368	100	100	100	96.4286	87.5	95	92.3077	77.7778	83.3333	89.8438	95	94.1176	86.3014	100	100	100	93.1034	75.7576	100	100	91.6667	100	82.9268	82.4561	92.8571	96.5517	100	87.6923	100	100	97.4359	95.6044	97.7778	100
Lipsmi1	48.4848	43.1373	85.7143	97.6331	74.0741	88.8889	83.3333	91.6667	87.5	85.0746	90	64.7059	79.1667	100	87.1345	96.1538	96.5909	95.8333	96.4286	87.5	95	84.6154	44.4444	58.3333	76.5625	100	94.1176	69.863	88	96.7742	91.6667	82.7586	42.4242	100	73.913	88.8889	100	58.5366	64.9123	92.8571	93.1034	94.5946	69.2308	83.3333	66.6667	82.0513	85.7143	86.6667	85.7143
Lipsta1_1	81.8182	92.1569	96.8254	100	85.1852	88.8889	100	91.6667	100	97.0149	100	82.3529	91.6667	95.6522	97.271	100	100	100	96.4286	100	100	100	88.8889	91.6667	96.875	95	100	87.6712	100	100	100	96.5517	87.8788	100	100	94.4444	100	92.6829	89.4737	92.8571	96.5517	100	93.8462	100	100	100	97.8022	100	100
Lipstar1_1	96.9697	98.0392	99.2063	100	88.8889	100	100	100	100	97.0149	100	100	91.6667	100	99.2203	100	100	97.9167	100	100	100	92.3077	97.2222	100	98.4375	100	100	98.6301	96	100	100	100	96.9697	100	100	100	100	97.561	98.2456	100	100	100	98.4615	100	100	100	100	97.7778	100
Lipstark1_1	98.4848	100	100	100	100	100	100	100	100	100	100	100	100	95.6522	99.8051	100	100	100	100	100	100	100	100	100	100	100	100	100	100	100	100	100	100	100	100	100	100	100	100	100	100	100	100	100	100	100	100	100	100
Lipsuo1	56.0606	49.0196	84.9206	97.0414	74.0741	83.3333	90	91.6667	93.75	86.5672	90	76.4706	83.3333	100	87.1345	92.3077	93.1818	93.75	96.4286	87.5	95	84.6154	47.2222	66.6667	78.125	95	94.1176	68.4932	88	96.7742	83.3333	89.6552	42.4242	100	82.6087	91.6667	100	56.0976	61.4035	92.8571	93.1034	94.5946	70.7692	83.3333	66.6667	84.6154	86.8132	84.4444	85.7143
Liptet1	77.2727	84.3137	93.6508	99.4083	77.7778	83.3333	100	83.3333	100	98.5075	100	88.2353	95.8333	100	95.1267	96.1538	98.8636	97.9167	96.4286	87.5	95	92.3077	83.3333	83.3333	92.1875	95	94.1176	89.0411	100	100	100	96.5517	81.8182	100	100	94.4444	100	87.8049	85.9649	92.8571	96.5517	100	89.2308	100	100	97.4359	95.6044	97.7778	100
Liptetr1	75.7576	80.3922	94.4444	100	81.4815	83.3333	100	83.3333	100	100	100	76.4706	100	95.6522	95.7115	100	100	100	96.4286	87.5	95	92.3077	77.7778	75	92.1875	95	94.1176	87.6712	100	100	100	93.1034	78.7879	100	100	94.4444	100	85.3659	84.2105	92.8571	96.5517	100	89.2308	100	100	97.4359	95.6044	100	100
Liptetra1	77.2727	82.3529	94.4444	99.4083	77.7778	83.3333	100	83.3333	100	98.5075	100	88.2353	95.8333	95.6522	95.3216	100	100	100	96.4286	87.5	95	92.3077	80.5556	83.3333	91.4062	95	94.1176	86.3014	100	100	100	96.5517	78.7879	100	100	91.6667	100	85.3659	84.2105	92.8571	93.1034	100	89.2308	100	100	97.4359	95.6044	97.7778	100
Lst7536_1	87.8788	96.0784	96.8254	100	85.1852	88.8889	100	100	100	97.0149	100	82.3529	91.6667	95.6522	97.8558	100	100	100	96.4286	100	100	100	91.6667	91.6667	97.6562	95	100	90.411	100	100	100	100	90.9091	100	100	97.2222	100	95.122	91.2281	92.8571	100	100	95.3846	100	100	100	97.8022	100	100
Lst7851_1	86.3636	94.1176	96.8254	100	88.8889	100	100	91.6667	100	98.5075	100	82.3529	95.8333	95.6522	97.076	100	100	100	96.4286	100	100	92.3077	88.8889	91.6667	95.3125	95	100	89.0411	100	100	100	100	90.9091	100	100	94.4444	100	92.6829	89.4737	92.8571	96.5517	100	95.3846	100	66.6667	100	97.8022	100	100
Lst8064_1	72.7273	80.3922	94.4444	99.4083	92.5926	88.8889	100	91.6667	100	97.0149	100	82.3529	100	100	95.9064	100	100	100	96.4286	100	100	92.3077	80.5556	83.3333	92.1875	95	100	87.6712	100	96.7742	83.3333	93.1034	75.7576	100	100	94.4444	100	85.3659	84.2105	92.8571	96.5517	100	89.2308	100	66.6667	97.4359	97.8022	93.3333	100
Myxme1	56.0606	50.9804	85.7143	96.4497	77.7778	83.3333	90	91.6667	93.75	88.0597	90	76.4706	87.5	100	86.9396	96.1538	95.4545	95.8333	96.4286	87.5	95	76.9231	47.2222	66.6667	76.5625	95	94.1176	68.4932	88	96.7742	83.3333	89.6552	42.4242	100	82.6087	91.6667	100	56.0976	61.4035	92.8571	93.1034	94.5946	69.2308	83.3333	66.6667	82.0513	86.8132	84.4444	85.7143
Yarlip1	28.7879	31.3725	73.0159	86.9822	44.4444	61.1111	86.6667	58.3333	81.25	70.1493	70	52.9412	66.6667	91.3043	76.8031	88.4615	86.3636	83.3333	92.8571	75	90	46.1538	30.5556	33.3333	64.8438	95	94.1176	56.1644	80	87.0968	50	82.7586	27.2727	100	86.9565	77.7778	92.3077	36.5854	50.8772	85.7143	75.8621	91.8919	56.9231	83.3333	66.6667	53.8462	70.3297	75.5556	42.8571
[truncated: 63 more columns]

## Sheet: info
This file contains the percentage of annotated pathways (via Lipomyces starkeyi NRRL 11557 kegg pathways) that have orthologs in the other species.
