# Supplementary material for: Genome-scale model development and genomic sequencing of the oleaginous clade Lipomyces
Source: Front Bioeng Biotechnol. 2024 Apr 4;12:1356551. doi: 10.3389/fbioe.2024.1356551 (PMC11024372; doi:10.3389/fbioe.2024.1356551)
Supplement: Supplementary file 4 [file Table1.XLSX]

## Sheet: EssentialGenes
Essential Gene: Lipst1_1_4883
Associated Pathways: Purine and Pyrimidine Biosynthesis
Essential Gene: Lipst1_1_72571
Associated Pathways: Citric Acid Cycle, Anaplerotic Reactions
Essential Gene: Lipst1_1_3884
Associated Pathways: Biosynthesis of Steroids: Terpenoid Backbone Synthesis
Essential Gene: Lipst1_1_102853
Associated Pathways: Cofactor and Prosthetic Group Biosynthesis
Essential Gene: Lipst1_1_72400
Associated Pathways: tRNA Charging
Essential Gene: Lipst1_1_5288
Associated Pathways: Tyrosine, Tryptophan, and Phenylalanine Metabolism
Essential Gene: Lipst1_1_925
Associated Pathways: Porphyrin and Chlorophyll Metabolism, Glycine, Serine, and Threonine Metabolism, Glycine and Serine Metabolism
Essential Gene: Lipst1_1_3878
Associated Pathways: Threonine and Lysine Metabolism
Essential Gene: Lipst1_1_3355
Associated Pathways: Histidine Metabolism
Essential Gene: Lipst1_1_149190
Associated Pathways: Valine, Leucine, and Isoleucine Metabolism
Essential Gene: Lipst1_1_954
Associated Pathways: Sterol Metabolism
Essential Gene: Lipst1_1_57094
Associated Pathways: Phospholipid Biosynthesis
Essential Gene: Lipst1_1_105439
Associated Pathways: Biosynthesis of Steroids: Ubiquinone/Terpenoid-quinone Biosynthesis
Essential Gene: Lipst1_1_47565
Associated Pathways: Tyrosine, Tryptophan, and Phenylalanine Metabolism
Essential Gene: Lipst1_1_37388
Associated Pathways: Sterol Metabolism
Essential Gene: Lipst1_1_5675
Associated Pathways: Cholesterol Metabolism, Sterol Metabolism
Essential Gene: Lipst1_1_4566
Associated Pathways: Porphyrin and Chlorophyll Metabolism
Essential Gene: Lipst1_1_147292
Associated Pathways: Riboflavin Metabolism
Essential Gene: Lipst1_1_48101
Associated Pathways: Threonine and Lysine Metabolism
Essential Gene: Lipst1_1_53798
Associated Pathways: NAD Biosynthesis, Nucleotide Salvage Pathway, NAD Metabolism
Essential Gene: Lipst1_1_3010
Associated Pathways: Unassigned
Essential Gene: Lipst1_1_99817
Associated Pathways: Vitamin B6 Metabolism, Cofactor and Prosthetic Group Biosynthesis
Essential Gene: Lipst1_1_5292
Associated Pathways: Cofactor and Prosthetic Group Biosynthesis
Essential Gene: Lipst1_1_63385
Associated Pathways: Sterol Metabolism
Essential Gene: Lipst1_1_5128
Associated Pathways: Valine, Leucine, and Isoleucine Metabolism
Essential Gene: Lipst1_1_1274
Associated Pathways: Arginine and Proline Metabolism
Essential Gene: Lipst1_1_275
Associated Pathways: Nicotinate and Nicotinamide Metabolism, NAD Biosynthesis, NAD Metabolism, Nucleotide Salvage Pathway, Purine and Pyrimidine Biosynthesis
Essential Gene: Lipst1_1_71996
Associated Pathways: Porphyrin and Chlorophyll Metabolism
Essential Gene: Lipst1_1_69891
Associated Pathways: Porphyrin and Chlorophyll Metabolism, Cofactor and Prosthetic Group Biosynthesis
Essential Gene: Lipst1_1_972
Associated Pathways: Methionine and Cysteine Metabolism
Essential Gene: Lipst1_1_102877
Associated Pathways: Nucleotide Salvage Pathway, Purine and Pyrimidine Biosynthesis
Essential Gene: Lipst1_1_69723
Associated Pathways: Transport, Extracellular
Essential Gene: Lipst1_1_148853
Associated Pathways: Tyrosine, Tryptophan, and Phenylalanine Metabolism
Essential Gene: Lipst1_1_155998
Associated Pathways: Folate Metabolism
Essential Gene: Lipst1_1_71411
Associated Pathways: One Carbon Pool by Folate, Folate Metabolism, Cofactor and Prosthetic Group Biosynthesis
Essential Gene: Lipst1_1_48150
Associated Pathways: Cholesterol Metabolism
Essential Gene: Lipst1_1_7307
Associated Pathways: Transport, Extracellular, Transport, Endoplasmic Reticular
Essential Gene: Lipst1_1_5341
Associated Pathways: Threonine and Lysine Metabolism
Essential Gene: Lipst1_1_75169
Associated Pathways: Purine and Pyrimidine Biosynthesis
Essential Gene: Lipst1_1_5235
Associated Pathways: Arginine and Proline Metabolism
Essential Gene: Lipst1_1_209648
Associated Pathways: Tyrosine, Tryptophan, and Phenylalanine Metabolism
Essential Gene: Lipst1_1_2110
Associated Pathways: tRNA Charging
Essential Gene: Lipst1_1_70321
Associated Pathways: Cofactor and Prosthetic Group Biosynthesis
Essential Gene: Lipst1_1_1263
Associated Pathways: Tyrosine, Tryptophan, and Phenylalanine Metabolism
Essential Gene: Lipst1_1_110210
Associated Pathways: Histidine Metabolism
Essential Gene: Lipst1_1_50180
Associated Pathways: Sterol Metabolism
Essential Gene: Lipst1_1_94412
Associated Pathways: Other Amino Acid Metabolism
Essential Gene: Lipst1_1_70001
Associated Pathways: Cofactor and Prosthetic Group Biosynthesis
Essential Gene: Lipst1_1_59355
Associated Pathways: Phospholipid Biosynthesis
Essential Gene: Lipst1_1_246321
Associated Pathways: Histidine Metabolism
Essential Gene: Lipst1_1_314464
Associated Pathways: Arginine and Proline Metabolism, Histidine Metabolism, Tryptophan Metabolism, Glyoxylate Metabolism, Tyrosine Metabolism, Pyruvate Metabolism, Phenylalanine Metabolism, Alternate Carbon Metabolism, One Carbon Pool by Folate, beta-Alanine Metabolism, Tyrosine, Tryptophan, and Phenylalanine Metabolism
Essential Gene: Lipst1_1_72186
Associated Pathways: Purine and Pyrimidine Biosynthesis
Essential Gene: Lipst1_1_5692
Associated Pathways: Threonine and Lysine Metabolism
Essential Gene: Lipst1_1_117054
Associated Pathways: Methionine Metabolism
Essential Gene: Lipst1_1_67972
Associated Pathways: Methionine Metabolism
Essential Gene: Lipst1_1_953
Associated Pathways: Biosynthesis of Steroids: Ubiquinone/Terpenoid-quinone Biosynthesis
Essential Gene: Lipst1_1_240513
Associated Pathways: Phospholipid Biosynthesis
Essential Gene: Lipst1_1_73715
Associated Pathways: Cholesterol Metabolism, Sterol Metabolism
Essential Gene: Lipst1_1_69651
Associated Pathways: Valine, Leucine, and Isoleucine Metabolism
Essential Gene: Lipst1_1_74886
Associated Pathways: Arginine and Proline Metabolism, Cofactor and Prosthetic Group Biosynthesis
Essential Gene: Lipst1_1_5558
Associated Pathways: Cofactor and Prosthetic Group Biosynthesis
Essential Gene: Lipst1_1_6557
Associated Pathways: Porphyrin and Chlorophyll Metabolism
Essential Gene: Lipst1_1_6444
Associated Pathways: Valine, Leucine, and Isoleucine Metabolism
Essential Gene: Lipst1_1_72774
Associated Pathways: Thiamine Metabolism, Cofactor and Prosthetic Group Biosynthesis
Essential Gene: Lipst1_1_300852
Associated Pathways: Cholesterol Metabolism, Sterol Metabolism
Essential Gene: Lipst1_1_52540
Associated Pathways: Purine and Pyrimidine Biosynthesis
Essential Gene: Lipst1_1_51135
Associated Pathways: Nucleotides, Nucleotide Salvage Pathway
Essential Gene: Lipst1_1_47161
Associated Pathways: Alternate Carbon Metabolism
Essential Gene: Lipst1_1_2889
Associated Pathways: One Carbon Pool by Folate, Purine and Pyrimidine Biosynthesis
Essential Gene: Lipst1_1_3919
Associated Pathways: Cofactor and Prosthetic Group Biosynthesis
Essential Gene: Lipst1_1_1145
Associated Pathways: Cofactor and Prosthetic Group Biosynthesis
Essential Gene: Lipst1_1_338321
Associated Pathways: Histidine Metabolism
Essential Gene: Lipst1_1_67605
Associated Pathways: Methionine Metabolism
Essential Gene: Lipst1_1_74872
Associated Pathways: Purine and Pyrimidine Biosynthesis, Drug Metabolism - Other Enzymes
Essential Gene: Lipst1_1_241647
Associated Pathways: Valine, Leucine, and Isoleucine Metabolism, Methionine Metabolism
Essential Gene: Lipst1_1_2700
Associated Pathways: Fatty Acid Elongation
Essential Gene: Lipst1_1_117393
Associated Pathways: Cofactor and Prosthetic Group Biosynthesis
Essential Gene: Lipst1_1_54959
Associated Pathways: Fatty Acid Biosynthesis, Sphingolipid Metabolism, Sterol Metabolism
Essential Gene: Lipst1_1_47667
Associated Pathways: Folate Metabolism
Essential Gene: Lipst1_1_3431
Associated Pathways: Threonine and Lysine Metabolism, Glycine and Serine Metabolism
Essential Gene: Lipst1_1_4472
Associated Pathways: Nicotinate and Nicotinamide Metabolism, NAD Biosynthesis
Essential Gene: Lipst1_1_70995
Associated Pathways: Cofactor and Prosthetic Group Biosynthesis
Essential Gene: Lipst1_1_2791
Associated Pathways: Purine and Pyrimidine Biosynthesis
Essential Gene: Lipst1_1_6367
Associated Pathways: Arginine and Proline Metabolism
Essential Gene: Lipst1_1_75335
Associated Pathways: Methionine Metabolism
Essential Gene: Lipst1_1_4592
Associated Pathways: Sphingolipid Metabolism
Essential Gene: Lipst1_1_73742
Associated Pathways: Porphyrin and Chlorophyll Metabolism
Essential Gene: Lipst1_1_73280
Associated Pathways: Fatty Acid Biosynthesis
Essential Gene: Lipst1_1_4390
Associated Pathways: Thiamine Metabolism, Riboflavin Metabolism
Essential Gene: Lipst1_1_67773
Associated Pathways: Cofactor and Prosthetic Group Biosynthesis
Essential Gene: Lipst1_1_7085
Associated Pathways: Cofactor and Prosthetic Group Biosynthesis
Essential Gene: Lipst1_1_74608
Associated Pathways: Cholesterol Metabolism, Sterol Metabolism
Essential Gene: Lipst1_1_2594
Associated Pathways: Vitamin B2 Metabolism, Alternate Carbon Metabolism, Folate Biosynthesis, Nucleotide interconversion
Essential Gene: Lipst1_1_265581
Associated Pathways: tRNA Charging, Glycine and Serine Metabolism
Essential Gene: Lipst1_1_73732
Associated Pathways: Thiamine Metabolism
Essential Gene: Lipst1_1_1034
Associated Pathways: Other Amino Acid Metabolism
Essential Gene: Lipst1_1_239921
Associated Pathways: Riboflavin Metabolism
Essential Gene: Lipst1_1_3975
Associated Pathways: Threonine and Lysine Metabolism
Essential Gene: Lipst1_1_643
Associated Pathways: Arginine and Proline Metabolism
Essential Gene: Lipst1_1_5895
Associated Pathways: Unassigned, NAD Biosynthesis
Essential Gene: Lipst1_1_1591
Associated Pathways: Sterol Metabolism
Essential Gene: Lipst1_1_3573
Associated Pathways: Cofactor and Prosthetic Group Biosynthesis
Essential Gene: Lipst1_1_72751
Associated Pathways: Nucleotide Salvage Pathway, Purine Metabolism
Essential Gene: Lipst1_1_238934
Associated Pathways: Tyrosine, Tryptophan, and Phenylalanine Metabolism
Essential Gene: Lipst1_1_75117
Associated Pathways: Phospholipid Biosynthesis
Essential Gene: Lipst1_1_72093
Associated Pathways: Cofactor and Prosthetic Group Biosynthesis
Essential Gene: Lipst1_1_88614
Associated Pathways: Glycoprotein Metabolism, N-Glycan Biosynthesis, Recycling, Lipopolysaccharide Biosynthesis
Essential Gene: Lipst1_1_73884
Associated Pathways: Fatty Acid Biosynthesis
Essential Gene: Lipst1_1_52642
Associated Pathways: tRNA Charging
Essential Gene: Lipst1_1_180753
Associated Pathways: Cofactor and Prosthetic Group Biosynthesis
Essential Gene: Lipst1_1_74203
Associated Pathways: Tetrahydrobiopterin, Cofactor and Prosthetic Group Biosynthesis
Essential Gene: Lipst1_1_5903
Associated Pathways: Sterol Metabolism
Essential Gene: Lipst1_1_46897
Associated Pathways: Phospholipid Biosynthesis
Essential Gene: Lipst1_1_68056
Associated Pathways: Cholesterol Metabolism
Essential Gene: Lipst1_1_73838
Associated Pathways: Folate Metabolism, Glyoxylate Metabolism
Essential Gene: Lipst1_1_486
Associated Pathways: Fatty Acid Biosynthesis
Essential Gene: Lipst1_1_35483
Associated Pathways: Tyrosine, Tryptophan, and Phenylalanine Metabolism
Essential Gene: Lipst1_1_70181
Associated Pathways: Transport, Mitochondrial
Essential Gene: Lipst1_1_55185
Associated Pathways: Unassigned, Nitrogen Metabolism
Essential Gene: Lipst1_1_103097
Associated Pathways: Tyrosine, Tryptophan, and Phenylalanine Metabolism
Essential Gene: Lipst1_1_68186
Associated Pathways: Purine and Pyrimidine Biosynthesis
Essential Gene: Lipst1_1_299000
Associated Pathways: Purine and Pyrimidine Biosynthesis
Essential Gene: Lipst1_1_102287
Associated Pathways: tRNA Charging
Essential Gene: Lipst1_1_67480
Associated Pathways: Valine, Leucine, and Isoleucine Degradation, Threonine and Lysine Metabolism, Glycolysis/Gluconeogenesis, Glycine and Serine Metabolism, Citric Acid Cycle, Lysine Metabolism, Valine, Leucine, and Isoleucine Metabolism
Essential Gene: Lipst1_1_25577
Associated Pathways: Purine and Pyrimidine Biosynthesis
Essential Gene: Lipst1_1_2767
Associated Pathways: Glutamate Metabolism
Essential Gene: Lipst1_1_33932
Associated Pathways: Histidine Metabolism
Essential Gene: Lipst1_1_189449
Associated Pathways: Purine and Pyrimidine Biosynthesis
Essential Gene: Lipst1_1_67949
Associated Pathways: Transport, Mitochondrial
Essential Gene: Lipst1_1_68107
Associated Pathways: Transport, Mitochondrial
Essential Gene: Lipst1_1_7391
Associated Pathways: Glutamate Metabolism
Essential Gene: Lipst1_1_283125
Associated Pathways: Pantothenate and CoA Biosynthesis
Essential Gene: Lipst1_1_3938
Associated Pathways: Purine and Pyrimidine Biosynthesis
Essential Gene: Lipst1_1_54073
Associated Pathways: Biosynthesis of Steroids: Ubiquinone/Terpenoid-quinone Biosynthesis
Essential Gene: Lipst1_1_73816
Associated Pathways: Biosynthesis of Steroids: Ubiquinone/Terpenoid-quinone Biosynthesis
Essential Gene: Lipst1_1_75768
Associated Pathways: Thiamine Metabolism
Essential Gene: Lipst1_1_141437
Associated Pathways: Glutamate Metabolism, Cell Envelope Biosynthesis
Essential Gene: Lipst1_1_2348
Associated Pathways: Valine, Leucine, and Isoleucine Metabolism, Cofactor and Prosthetic Group Biosynthesis
Essential Gene: Lipst1_1_3860
Associated Pathways: Arginine and Proline Metabolism
Essential Gene: Lipst1_1_4257
Associated Pathways: Oxidative Phosphorylation, Anaplerotic Reactions
Essential Gene: Lipst1_1_81155
Associated Pathways: Transport, Mitochondrial
Essential Gene: Lipst1_1_54828
Associated Pathways: Sterol Metabolism
Essential Gene: Lipst1_1_61809
Associated Pathways: Methionine Metabolism, Cysteine Metabolism
Essential Gene: Lipst1_1_70723
Associated Pathways: Cofactor and Prosthetic Group Biosynthesis
Essential Gene: Lipst1_1_2223
Associated Pathways: tRNA Charging
Essential Gene: Lipst1_1_48617
Associated Pathways: Histidine Metabolism
Essential Gene: Lipst1_1_69994
Associated Pathways: Unassigned, Sphingolipid Metabolism
Essential Gene: Lipst1_1_70305
Associated Pathways: Nucleotide Salvage Pathway
Essential Gene: Lipst1_1_69966
Associated Pathways: Glutamine Metabolism
Essential Gene: Lipst1_1_89607
Associated Pathways: Histidine Metabolism
Essential Gene: Lipst1_1_72557
Associated Pathways: Pantothenate and CoA Biosynthesis
Essential Gene: Lipst1_1_73846
Associated Pathways: Cholesterol Metabolism, Sterol Metabolism
Essential Gene: Lipst1_1_67222
Associated Pathways: Cofactor and Prosthetic Group Biosynthesis
Essential Gene: Lipst1_1_5978
Associated Pathways: Purine and Pyrimidine Biosynthesis, Purine Metabolism, Drug Metabolism - Other Enzymes
Essential Gene: Lipst1_1_258919
Associated Pathways: NAD Biosynthesis, Cofactor and Prosthetic Group Biosynthesis
Essential Gene: Lipst1_1_71443
Associated Pathways: Arginine and Proline Metabolism, Urea Cycle/Amino Group Metabolism
Essential Gene: Lipst1_1_72215
Associated Pathways: Valine, Leucine, and Isoleucine Metabolism, Glycine, Serine, and Threonine Metabolism, Glycine, Serine, Alanine, and Threonine Metabolism, Glycine and Serine Metabolism
Essential Gene: Lipst1_1_3320
Associated Pathways: Citric Acid Cycle, Lysine Metabolism
Essential Gene: Lipst1_1_2195
Associated Pathways: Pyrimidine Metabolism, Arginine and Proline Metabolism, Purine and Pyrimidine Biosynthesis
Essential Gene: Lipst1_1_256229
Associated Pathways: Folate Metabolism, Cofactor and Prosthetic Group Biosynthesis
Essential Gene: Lipst1_1_162168
Associated Pathways: Cofactor and Prosthetic Group Biosynthesis
Essential Gene: Lipst1_1_70691
Associated Pathways: Riboflavin Metabolism
Essential Gene: Lipst1_1_67262
Associated Pathways: Sterol Metabolism
Essential Gene: Lipst1_1_193402
Associated Pathways: Nucleotide Salvage Pathway, Purine and Pyrimidine Biosynthesis
Essential Gene: Lipst1_1_246003
Associated Pathways: Citric Acid Cycle, Lysine Metabolism
Essential Gene: Lipst1_1_108075
Associated Pathways: Biosynthesis of Steroids: Ubiquinone/Terpenoid-quinone Biosynthesis
Essential Gene: Lipst1_1_336589
Associated Pathways: Porphyrin and Chlorophyll Metabolism
Essential Gene: Lipst1_1_67652
Associated Pathways: Purine and Pyrimidine Biosynthesis
Essential Gene: Lipst1_1_1834
Associated Pathways: Glycine, Serine, and Threonine Metabolism, tRNA Charging
Essential Gene: Lipst1_1_67513
Associated Pathways: tRNA Charging, Alanine and Aspartate Metabolism
Essential Gene: Lipst1_1_1069
Associated Pathways: Methionine Metabolism
Essential Gene: Lipst1_1_139115
Associated Pathways: Tryptophan Metabolism, Tyrosine, Tryptophan, and Phenylalanine Metabolism
Essential Gene: Lipst1_1_58737
Associated Pathways: Tyrosine, Tryptophan, and Phenylalanine Metabolism
Essential Gene: Lipst1_1_68284
Associated Pathways: Cell Envelope Biosynthesis
Essential Gene: Lipst1_1_3965
Associated Pathways: Tyrosine, Tryptophan, and Phenylalanine Metabolism
Essential Gene: Lipst1_1_3985
Associated Pathways: Methionine Metabolism, Nucleotide Salvage Pathway
Essential Gene: Lipst1_1_69028
Associated Pathways: Unassigned, Arginine and Proline Metabolism
Essential Gene: Lipst1_1_74905
Associated Pathways: Riboflavin Metabolism
Essential Gene: Lipst1_1_74675
Associated Pathways: Cell Envelope Biosynthesis
Essential Gene: Lipst1_1_76037
Associated Pathways: Sterol Metabolism
Essential Gene: Lipst1_1_2352
Associated Pathways: Fatty Acid Biosynthesis, Sphingolipid Metabolism, Sterol Metabolism
Essential Gene: Lipst1_1_74235
Associated Pathways: Porphyrin and Chlorophyll Metabolism
Essential Gene: Lipst1_1_54023
Associated Pathways: Sterol Metabolism
Essential Gene: Lipst1_1_75116
Associated Pathways: Glycine, Serine, and Threonine Metabolism, tRNA Charging
Essential Gene: Lipst1_1_3290
Associated Pathways: Inositol Phosphate Metabolism, Alternate Carbon Metabolism, Cell Envelope Biosynthesis
Essential Gene: Lipst1_1_70511
Associated Pathways: Purine and Pyrimidine Biosynthesis
Essential Gene: Lipst1_1_69377
Associated Pathways: Phospholipid Biosynthesis
Essential Gene: Lipst1_1_101656
Associated Pathways: Arginine and Proline Metabolism, Threonine and Lysine Metabolism
Essential Gene: Lipst1_1_105823
Associated Pathways: tRNA Charging
Essential Gene: Lipst1_1_3931
Associated Pathways: Methionine Metabolism
Essential Gene: Lipst1_1_75007
Associated Pathways: Unassigned
Essential Gene: Lipst1_1_115412
Associated Pathways: Phospholipid Biosynthesis
Essential Gene: Lipst1_1_68121
Associated Pathways: Tryptophan Metabolism, Tyrosine, Tryptophan, and Phenylalanine Metabolism
Essential Gene: Lipst1_1_157499
Associated Pathways: Nucleotides, Nucleotide Salvage Pathway
Essential Gene: Lipst1_1_1228
Associated Pathways: Vitamin B6 Metabolism, Cofactor and Prosthetic Group Biosynthesis
Essential Gene: Lipst1_1_260066
Associated Pathways: Cofactor and Prosthetic Group Biosynthesis
Essential Gene: Lipst1_1_67613
Associated Pathways: Cofactor and Prosthetic Group Biosynthesis
Essential Gene: Lipst1_1_68196
Associated Pathways: Pantothenate and CoA Biosynthesis
Essential Gene: Lipst1_1_288751
Associated Pathways: Fructose and Mannose Metabolism
Essential Gene: Lipst1_1_70877
Associated Pathways: Arginine and Proline Metabolism, Urea Cycle/Amino Group Metabolism
Essential Gene: Lipst1_1_316583
Associated Pathways: Tyrosine, Tryptophan, and Phenylalanine Metabolism
Essential Gene: Lipst1_1_1559
Associated Pathways: Purine and Pyrimidine Biosynthesis

## Sheet: Info
List of genes that when knocked out in iLst996 lead to biomass growth values less than 1e-3.
